# Supplementary material for: High tribo-corrosion resistance of Ni-Cr-5Al 2 O 3 thermal spray coating: a comparison of post processing techniques
Source: publisher site journal article supplement (doi:10.1515/corrrev-2024-0065), 2024-12-08
Supplement: Supplementary file 1 [file j_corrrev-2024-0065_suppl_001.docx]

**Supplementary Material**

**High tribo-corrosion resistance of Ni-Cr-5Al2O3 thermal spray coating: a comparison of postprocessing techniques**

Mayank Gar et al.

DOI 10.1515/corrrev-2024-0065

**
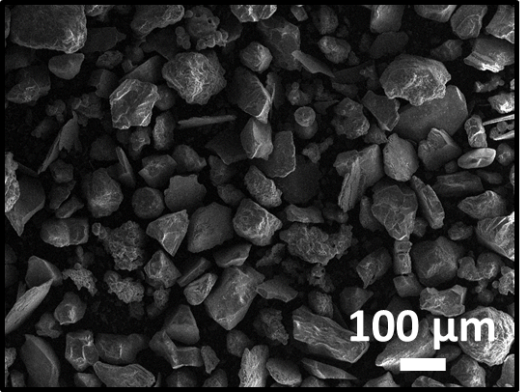
**

**Supplementary Figure S1:** BSE image river sand.

**
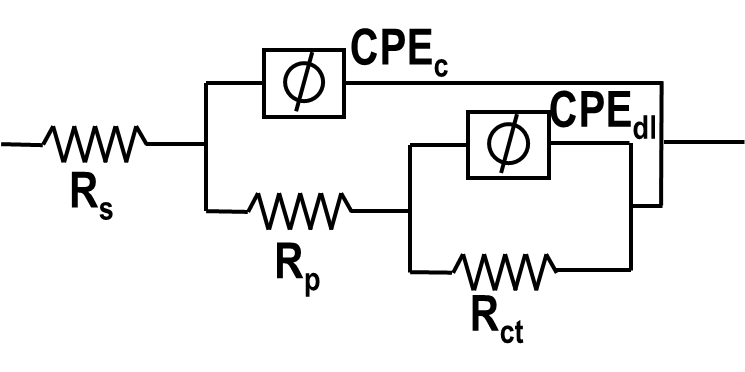
**

**Supplementary Figure S2:** Electrical equivalent circuit (EEC) diagram for fitting of impedance spectra.

**Supplementary Table S1:** Chemical composition of SS316L.

| **Element** | C | Si | Mn | P | S | Cr | Ni | Mo | N |
| --- | --- | --- | --- | --- | --- | --- | --- | --- | --- |
| **Weight %** | 0.09 | 0.28 | 0.92 | 0.01 | 0.01 | 18.82 | 9.89 | 1.93 | 0.00 |

**Supplementary Table S2:** Test parameters used for the slurry erosion testing.

| **Parameters** | **Value** |
| --- | --- |
| Stand-off distance | 20 mm |
| Sand particle concentration | 5000 ppm |
| Sand particle size | 75-150 µm |
| Angle of impact | 30°, 90° |
| Jet velocity | 20 m/s |
| Test duration | 2 h |
